# Supplementary material for: Vinyl-Functionalized Janus Ring Siloxane: Potential Precursors to Hybrid Functional Materials
Source: MDPI journal article supplement (doi:10.3390/ma14082014), 2021-04-16
Supplement: s1 [file s1]

Supplementary

# Vinyl-Functionalized Janus Ring Siloxane: Potential Precursors to Hybrid Functional Materials

Thanawat Chaiprasert, Yujia Liu, Nobuhiro Takeda and Masafumi Unno \*

Department of Chemistry and Chemical Biology, Graduate School of Science and Technology, Gunma University, Kiryu 376–8515, Japan; t182a007@gunma-u.ac.jp (T.C.); yliu@gunma-u.ac.jp (Y.L.); ntakeda@gunma-u.ac.jp (N.T.)

\* Correspondence: unno@gunma-u.ac.jp

**Table S1.** The summarization of  $^{29}\text{Si}$  NMR of vinyl-functionalized Janus ring products.

| Sample          | $^{29}\text{Si}$ NMR (119.24 MHz, $\text{CDCl}_3$ ) |                 |
|-----------------|-----------------------------------------------------|-----------------|
|                 | D-unit Si (ppm)                                     | T-unit Si (ppm) |
| Janus precursor | −4.08                                               | −79.63          |
| Vi-JR-01        | −11.90                                              | −80.69          |
| Vi-JR-02        | −12.29                                              | −80.67          |
| Vi-JR-03        | −11.80                                              | −80.69          |
| Vi-JR-04        | −11.21                                              | −80.51          |
| Vi-JR-05        | −11.19                                              | −80.51          |
| Vi-JR-06        | −10.68                                              | −80.02          |
| Vi-JR-07        | −11.84                                              | −80.68          |
| Vi-JR-08        | −11.18                                              | −80.32          |

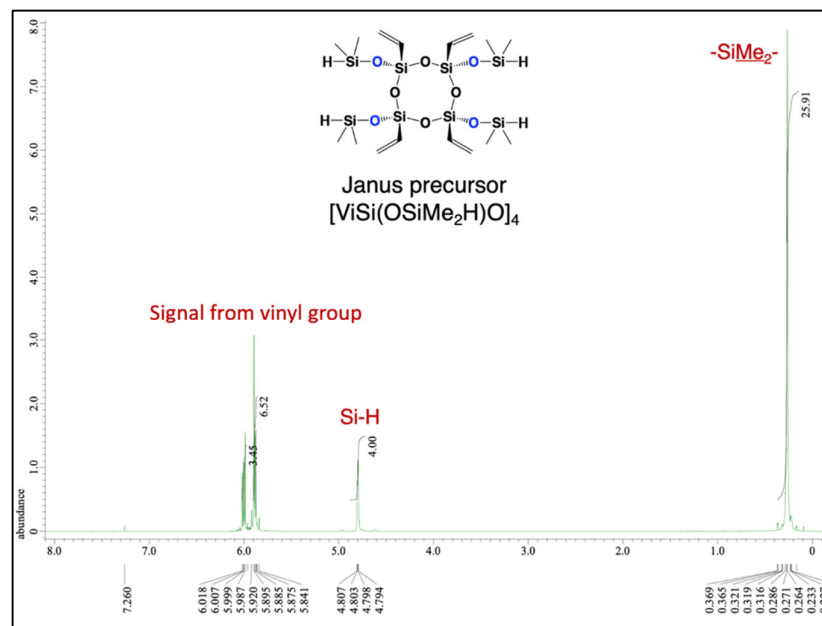

**Figure S1.**  $^1\text{H}$  NMR (600.17 MHz,  $\text{CDCl}_3$ ):  $\delta$  0.26 (s, 24H,  $\text{SiMe}_2$ ), 4.79–4.80 (m, 4H,  $\text{SiH}$ ), and 5.84–6.02 (m, 12H,  $\text{CH}=\text{CH}_2$  and  $\text{CH}=\text{CH}_2$  at vinyl group) ppm.

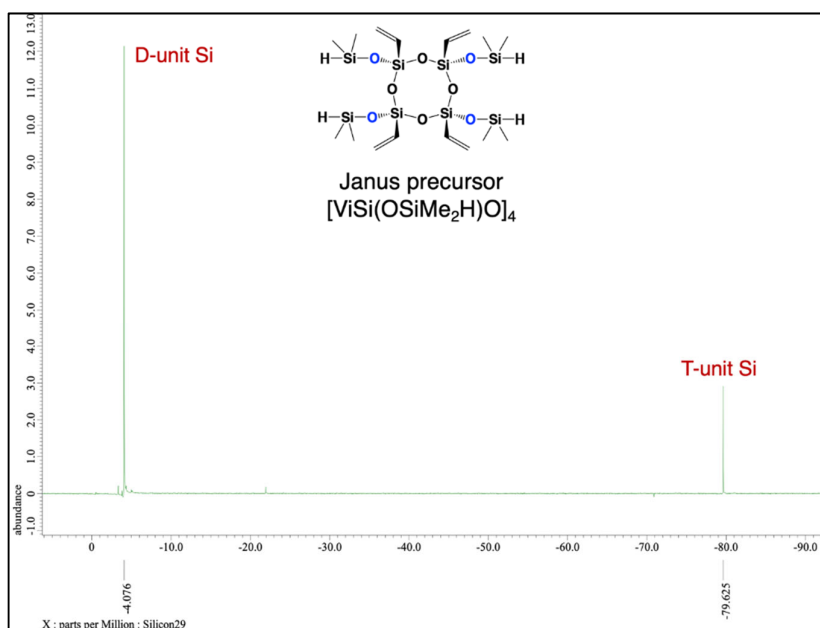

**Figure S2.**  $^{29}\text{Si}$  NMR (119.24 MHz,  $\text{CDCl}_3$ ):  $\delta$   $-4.08$  ppm (D-unit Si) and  $-79.63$  ppm (T-unit Si).

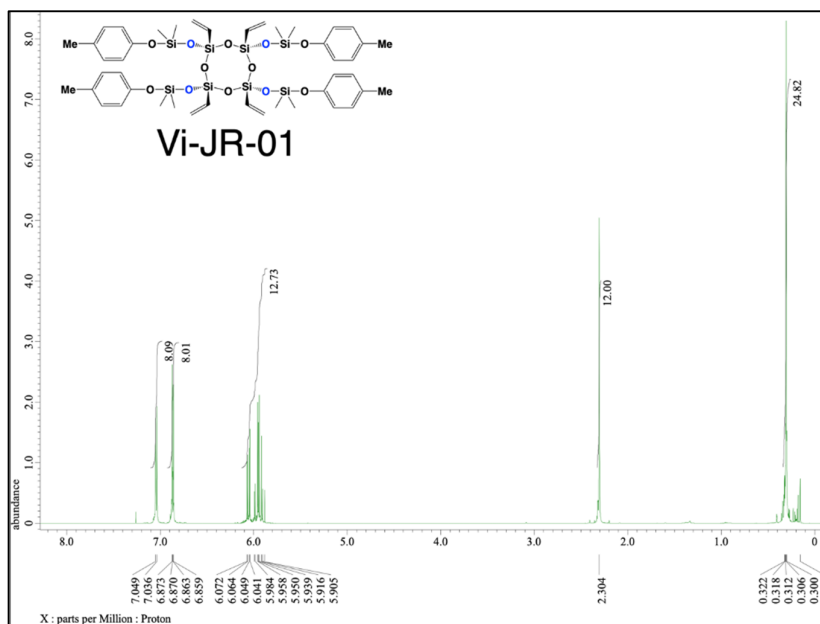

**Figure S3.**  $^1\text{H}$  NMR (600.17 MHz,  $\text{CDCl}_3$ ):  $\delta$  0.31 (s, 24H,  $\text{SiMe}_2$ ), 2.30 (s, 12H,  $\text{Ar}-\text{CH}_3$ ), 5.90–6.07 (m, 12H,  $\text{CH}=\text{CH}_2$  and  $\text{CH}=\text{CH}_2$  at vinyl group), and 6.85–7.05 ppm (m, 16H, Ar-H).

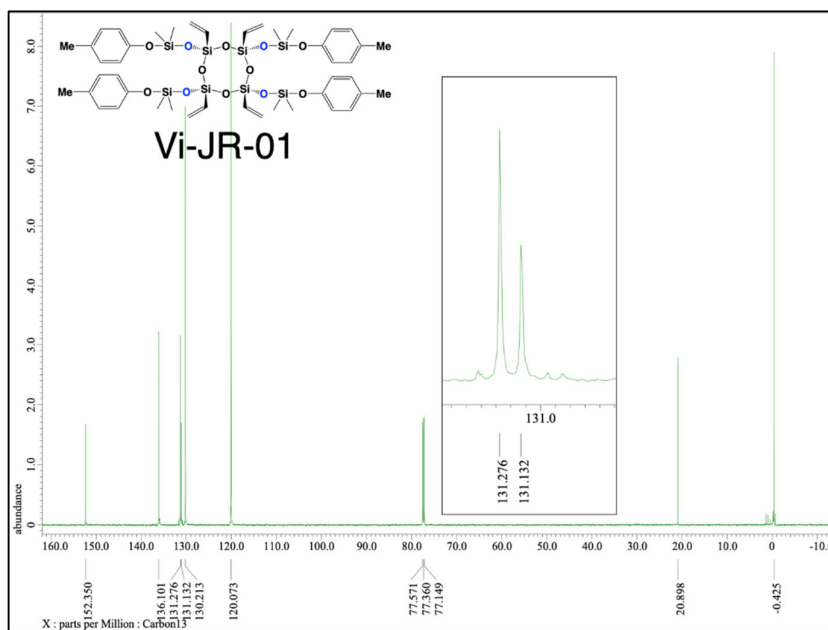

**Figure S4.**  $^{13}\text{C}$  NMR (150.91 MHz,  $\text{CDCl}_3$ ):  $\delta$  -0.42, 20.90, 120.07, 130.21, 131.13, 131.28, 136.10, and 152.35 ppm.

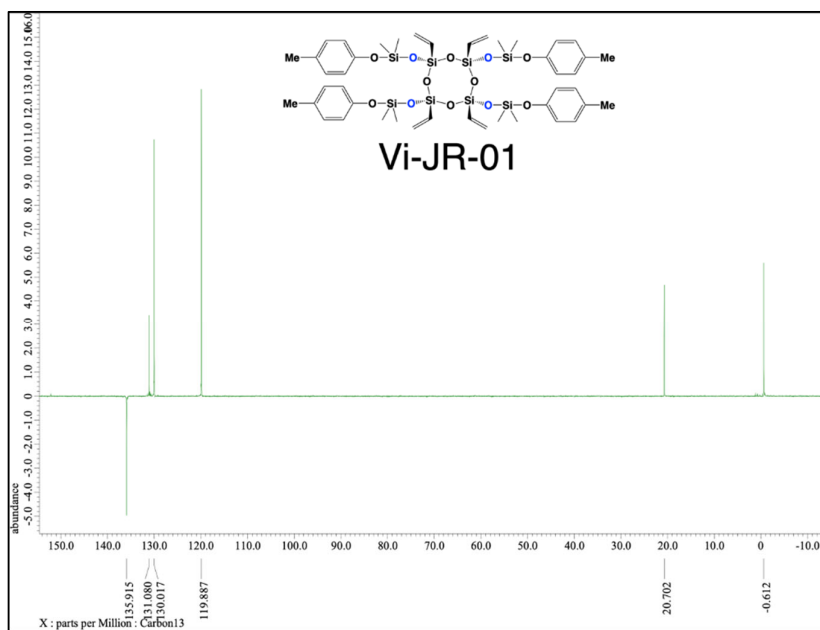

**Figure S5.**  $^{13}\text{C}$  NMR (150.91 MHz, DEPT-135,  $\text{CDCl}_3$ ):  $\delta$  -0.61, 20.70, 119.89, 130.01, 131.08, and 135.92 ppm ( $\text{CH}=\text{CH}_2$ ).

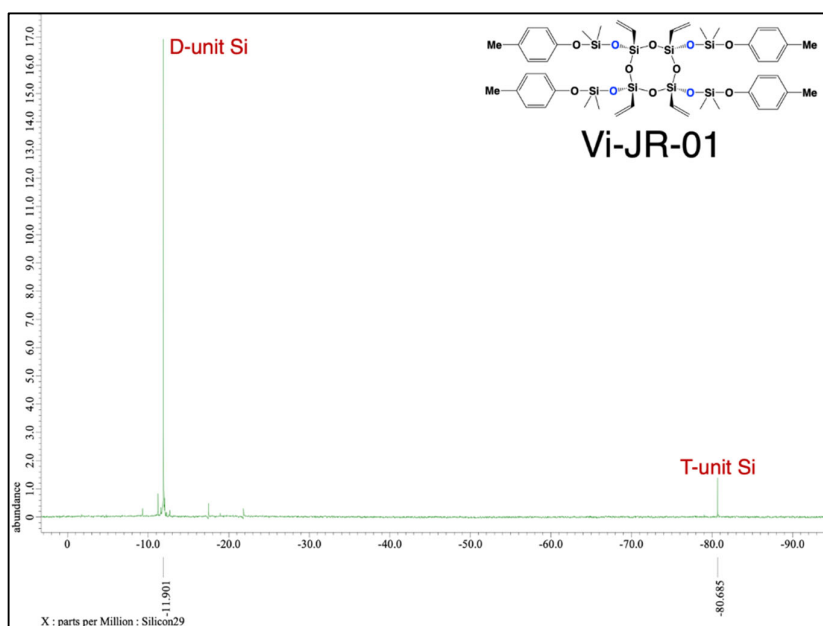

**Figure S6.**  $^{29}\text{Si}$  NMR (119.24 MHz,  $\text{CDCl}_3$ ):  $\delta$  -11.90 ppm (D-unit Si) and -80.69 ppm (T-unit Si).

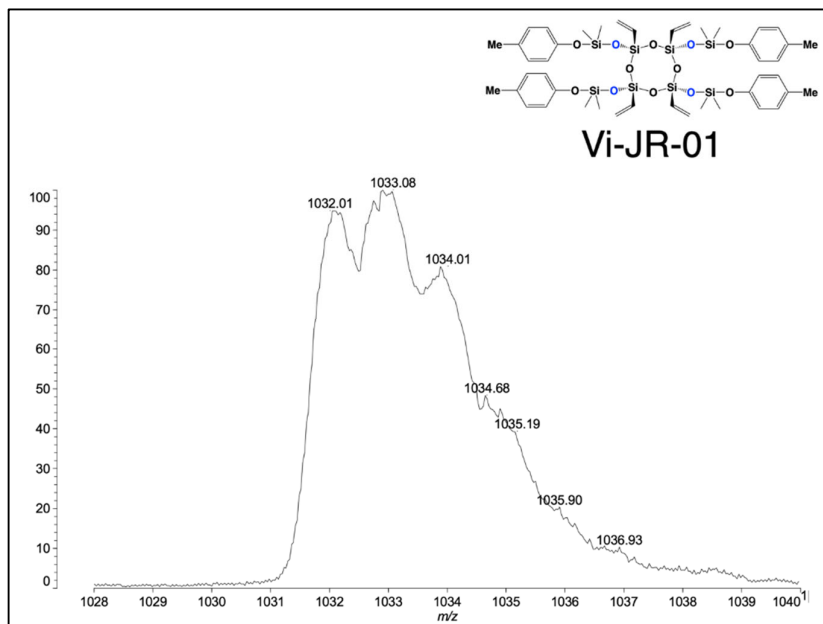

**Figure S7.** MALDI-TOF results of Vi-JR-01 (Calculated  $[\text{M} + \text{Na}]^+ = 1031.24$ ).

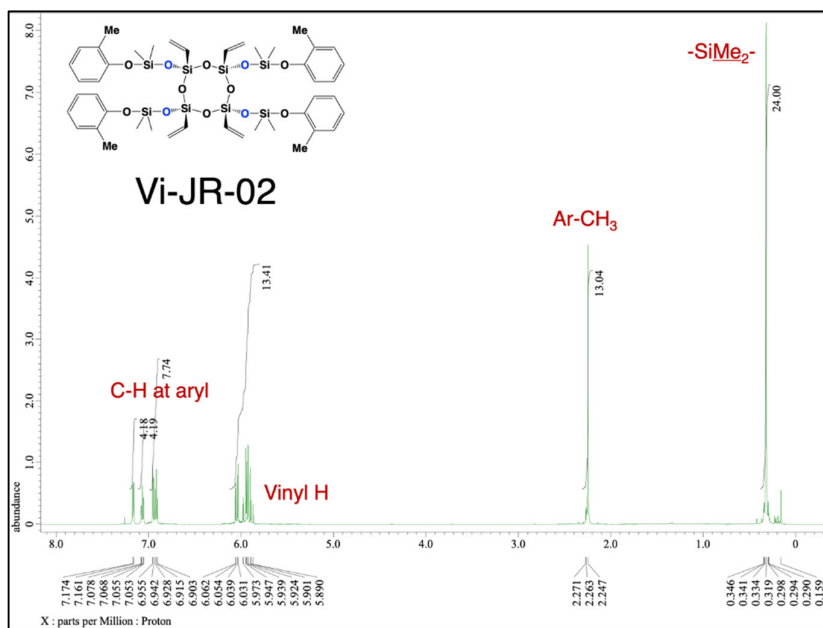

**Figure S8.**  $^1\text{H}$  NMR (600.17 MHz,  $\text{CDCl}_3$ ):  $\delta$  0.32 (s, 24H,  $\text{SiMe}_2$ ), 2.26 (s, 12H,  $\text{Ar-CH}_3$ ), 5.89–6.06 (m, 12H,  $\text{CH=CH}_2$  and  $\text{CH=CH}_2$  at vinyl group), and 6.90–7.17 ppm (m, 16H,  $\text{Ar-H}$ ).

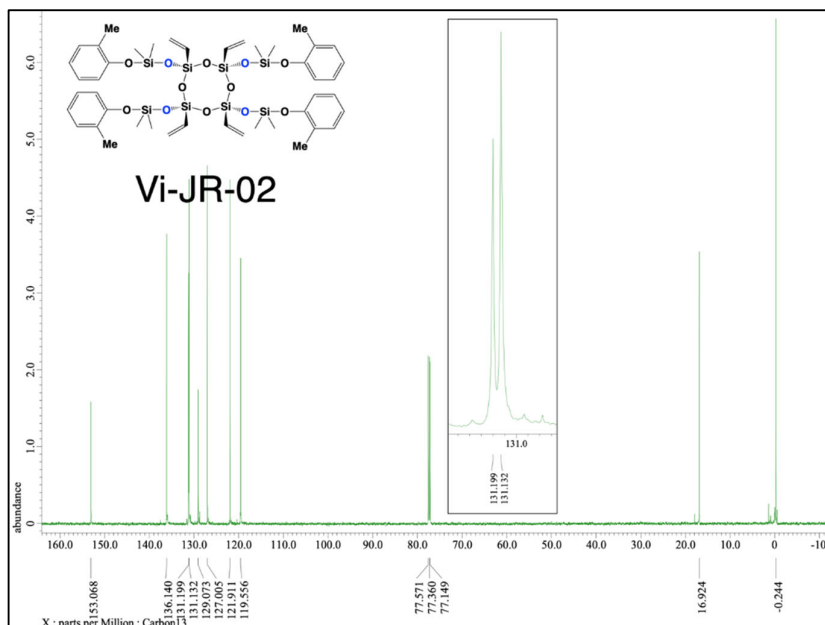

**Figure S9.**  $^{13}\text{C}$  NMR (150.91 MHz,  $\text{CDCl}_3$ ):  $\delta$  -0.24, 16.92, 119.56, 121.91, 127.00, 129.07, 131.13, 131.19, 136.14, and 153.07 ppm.

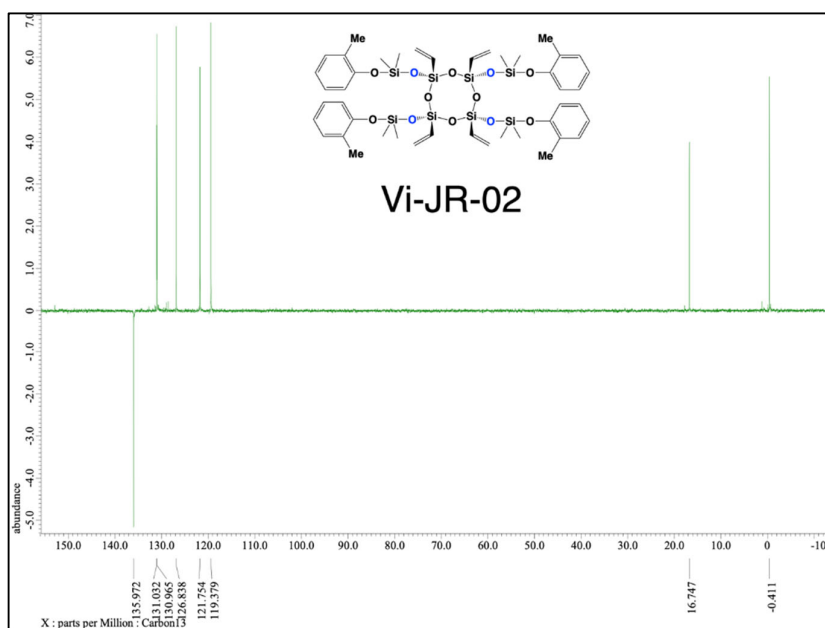

**Figure S10.**  $^{13}\text{C}$  NMR (150.91 MHz, DEPT-135,  $\text{CDCl}_3$ ):  $\delta$  -0.41, 16.75, 119.37, 126.84, 130.97, 131.03, and 135.97 ppm ( $\text{CH}=\text{CH}_2$ ).

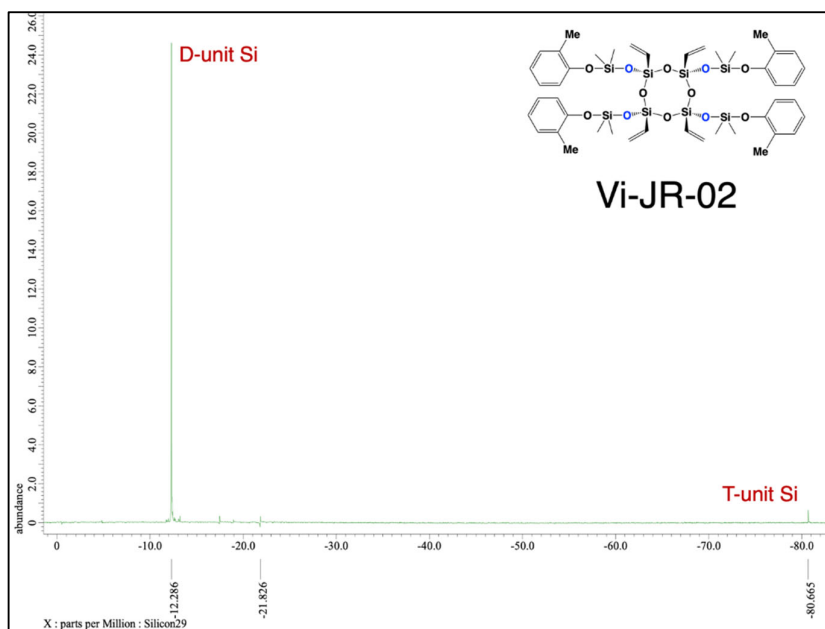

**Figure S11.**  $^{29}\text{Si}$  NMR (119.24 MHz,  $\text{CDCl}_3$ ):  $\delta$  -12.29 ppm (D-unit Si) and -80.67 ppm (T-unit Si).

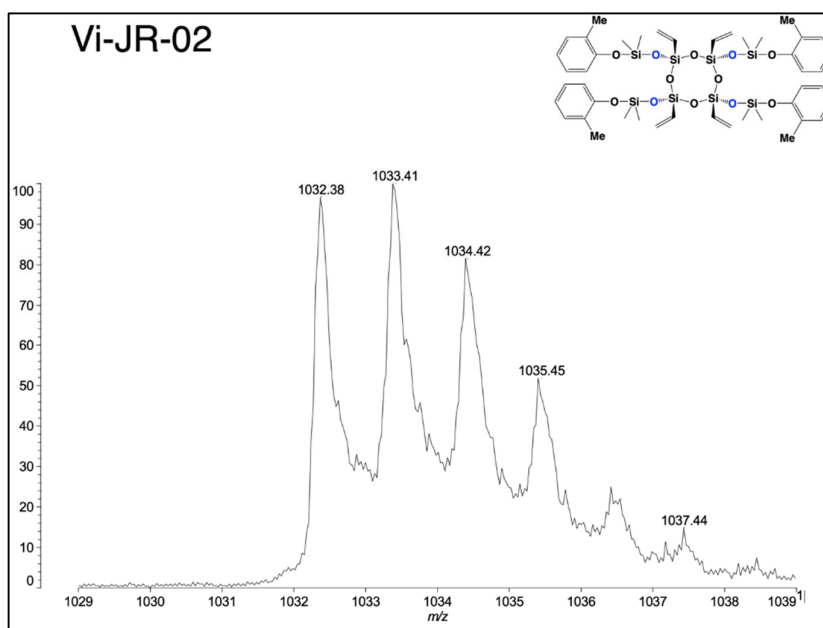

**Figure S12.** MALDI-TOF results of Vi-JR-02 (Calculated  $[M + Na]^+ = 1031.24$ ).

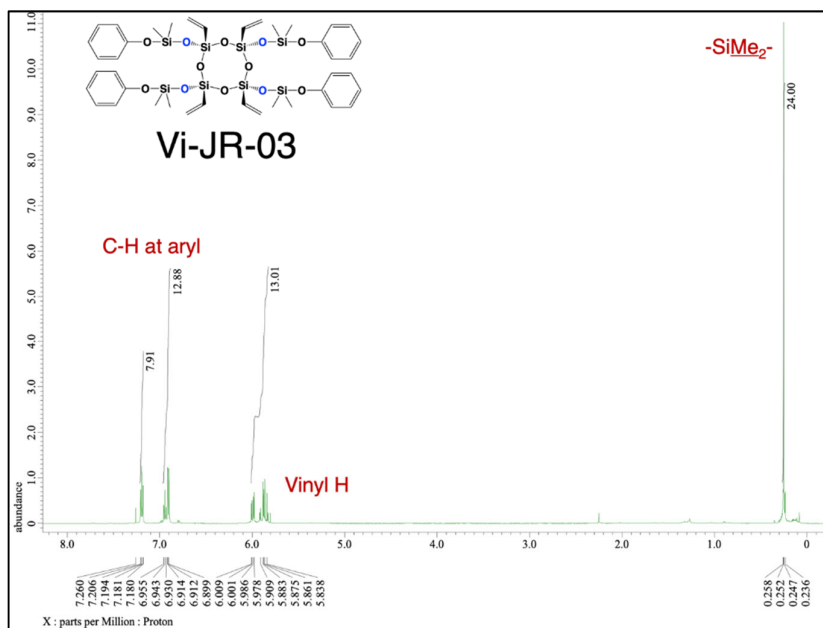

**Figure S13.**  $^1\text{H}$  NMR (600.17 MHz,  $\text{CDCl}_3$ ):  $\delta$  0.25 (s, 24H,  $\text{SiMe}_2$ ), 5.84–6.00 (m, 12H,  $\text{CH}=\text{CH}_2$  and  $\text{CH}=\text{CH}_2$  at vinyl group), and 6.90–7.21 ppm (m, 16H, Ar-H).

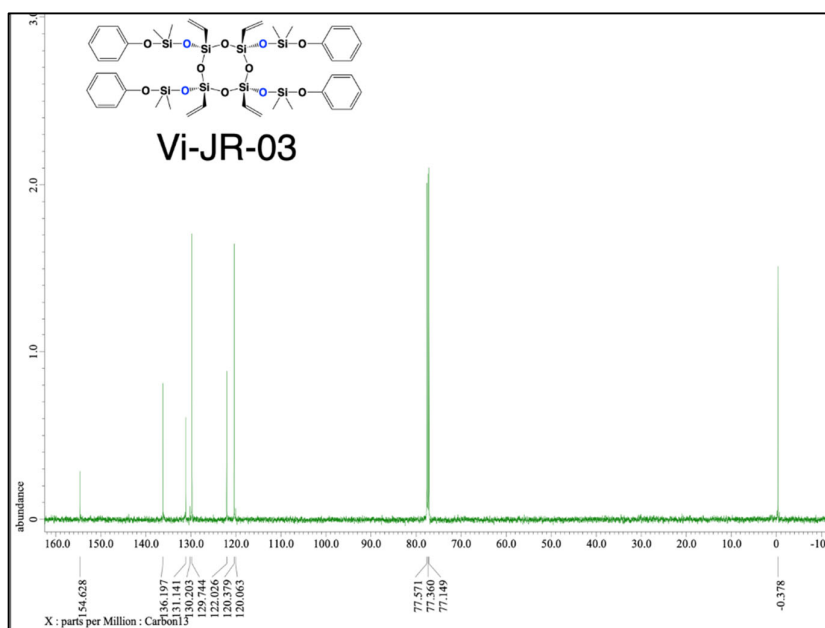

**Figure S14.** <sup>13</sup>C NMR (150.91 MHz, CDCl<sub>3</sub>): δ −0.38, 120.06, 120.40, 122.03, 129.74, 130.02, 131.41, 136.20, and 154.63 ppm.

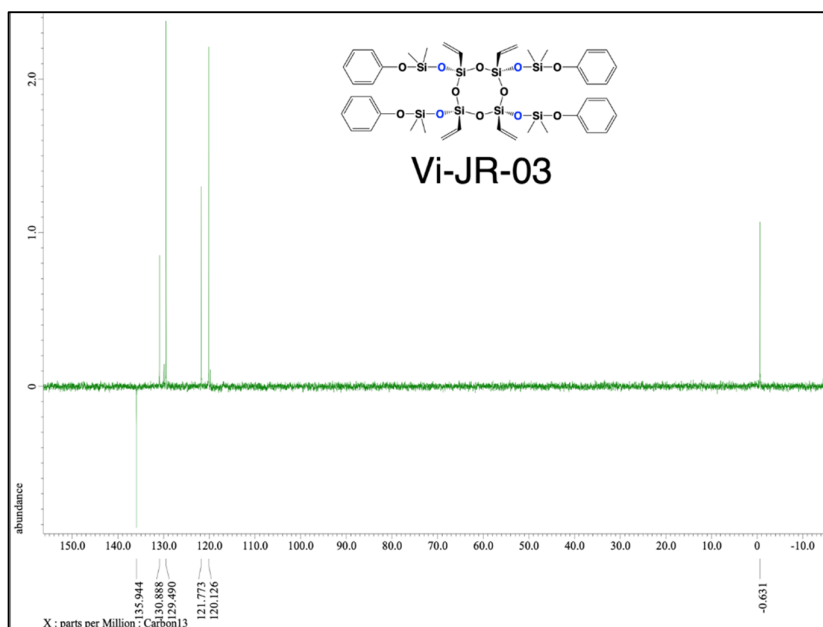

**Figure S15.** <sup>13</sup>C NMR (150.91 MHz, DEPT-135, CDCl<sub>3</sub>): δ −0.63, 120.13, 121.77, 129.49, 130.89, and 135.94 ppm.



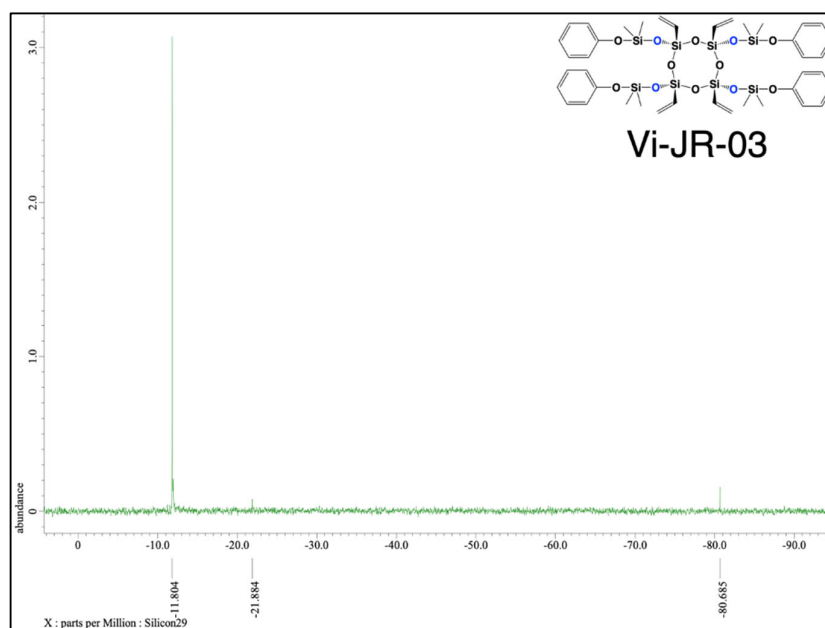

Figure S16.  $^{29}\text{Si}$  NMR (119.24 MHz,  $\text{CDCl}_3$ ):  $\delta$  -11.80 ppm (D-unit Si) and -80.69 ppm (T-unit Si).

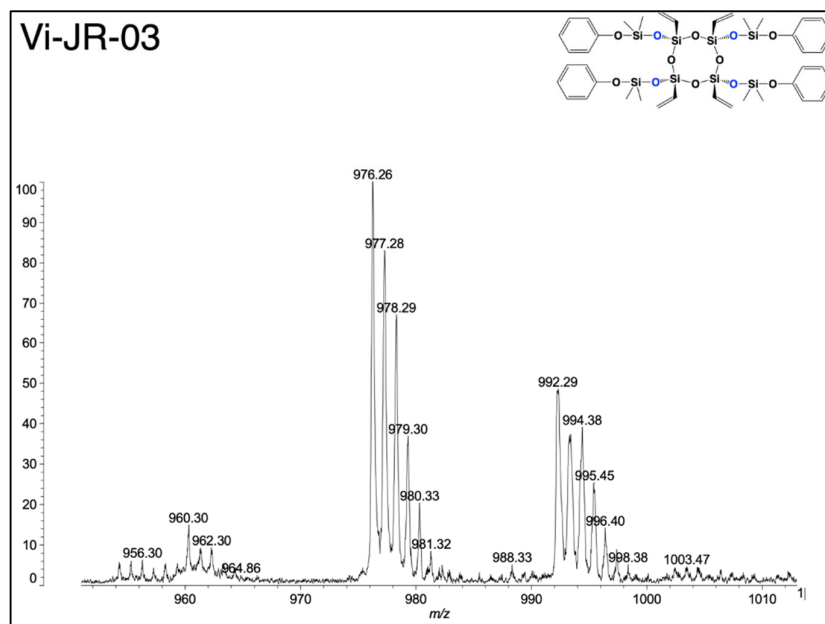

Figure S17. MALDI-TOF results of Vi-JR-03 (Calculated  $[\text{M} + \text{Na}]^+ = 975.18$ ).

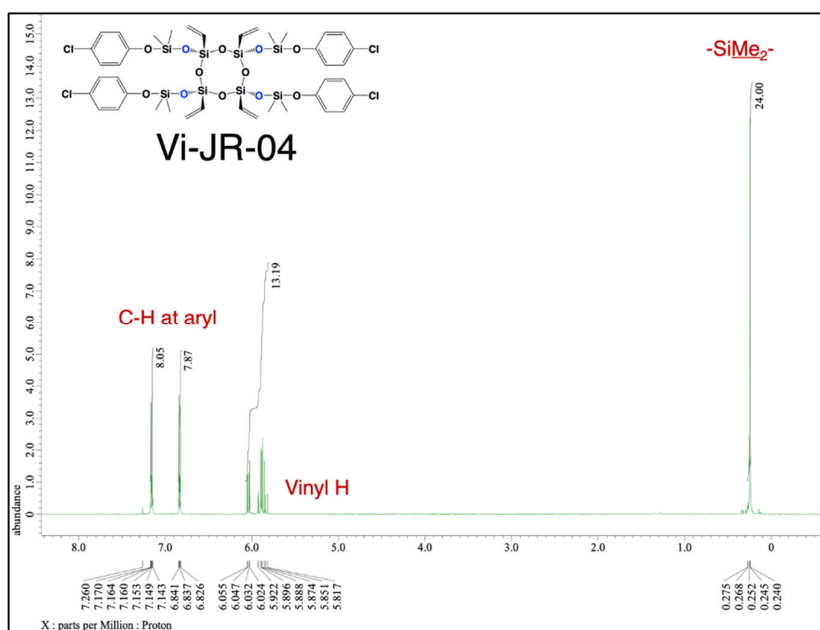

**Figure S18.** <sup>1</sup>H NMR (600.17 MHz, CDCl<sub>3</sub>): δ 0.25 (s, 24H, SiMe<sub>2</sub>), 5.82–6.55 (m, 12H, CH=CH<sub>2</sub> and CH=CH<sub>2</sub> at vinyl group), and 6.82–7.17 ppm (m, 16H, Ar–H).

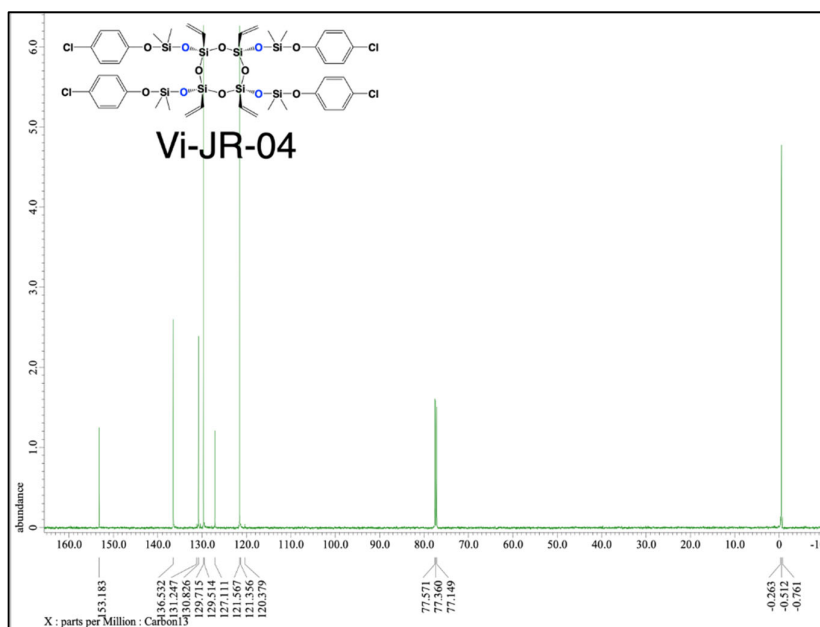

**Figure S19.** <sup>13</sup>C NMR (150.91 MHz, CDCl<sub>3</sub>): δ −0.51, 120.38, 121.36, 121.57, 127.11, 129.51, 129.72, 130.83, 131.25, 136.53, and 153.18 ppm.

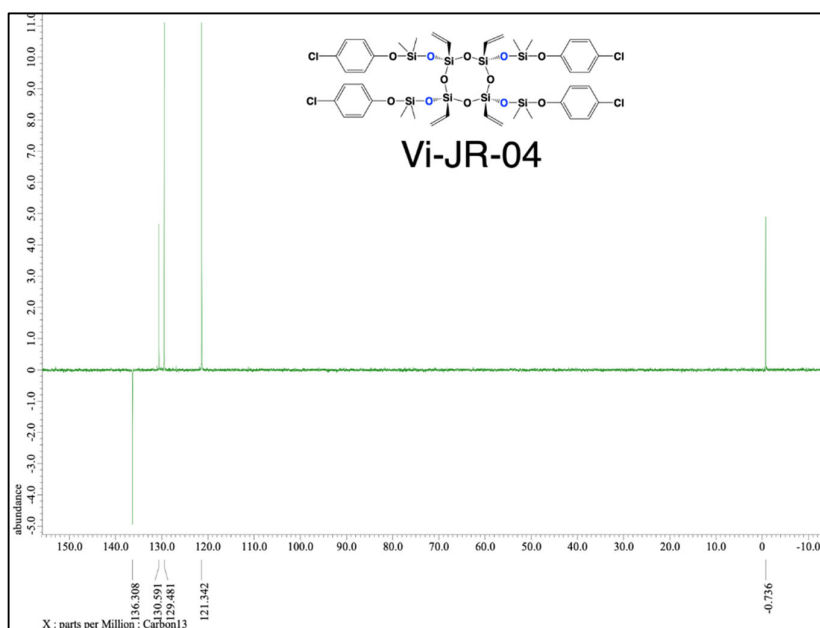

**Figure S20.** <sup>13</sup>C NMR (150.91 MHz, DEPT-135, CDCl<sub>3</sub>): δ −0.74, 121.34, 129.48, 130.59, and 136.31 ppm.

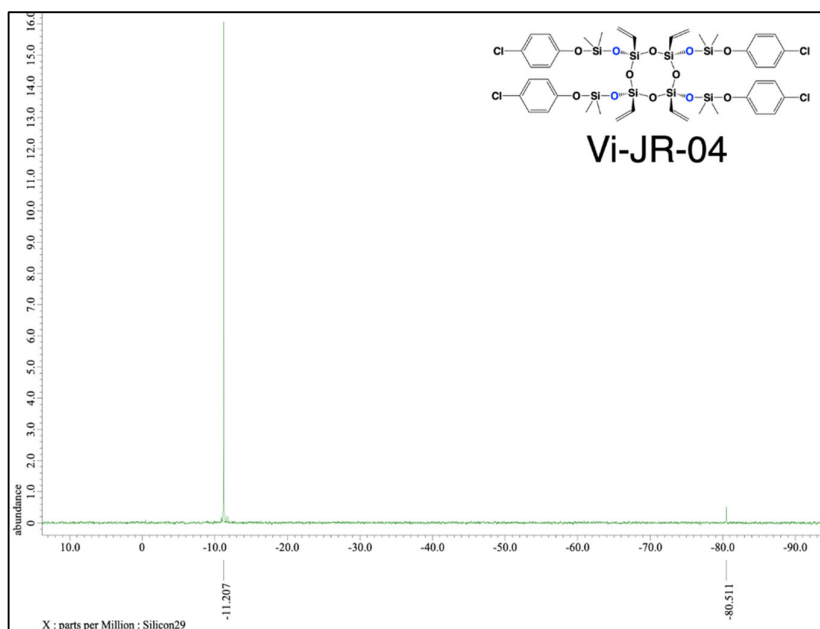

**Figure S21.** <sup>29</sup>Si NMR (119.24 MHz, CDCl<sub>3</sub>): δ −11.21 ppm (D-unit Si) and −80.51 ppm (T-unit Si).

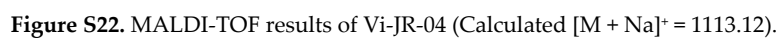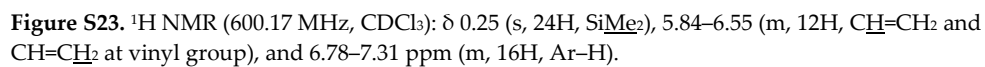

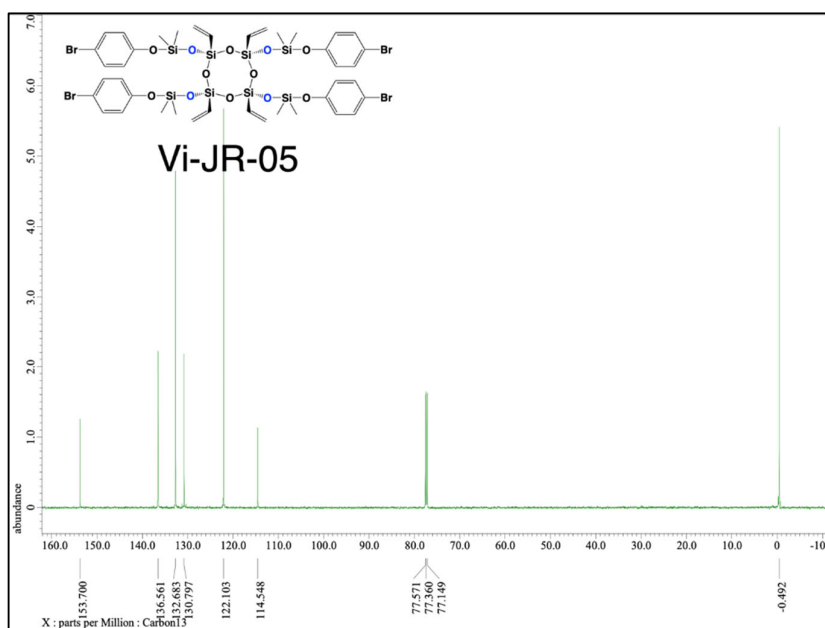

**Figure S24.** <sup>13</sup>C NMR (150.91 MHz, CDCl<sub>3</sub>): δ −0.49, 114.54, 122.10, 130.98, 132.68, 136.56, and 153.70 ppm.

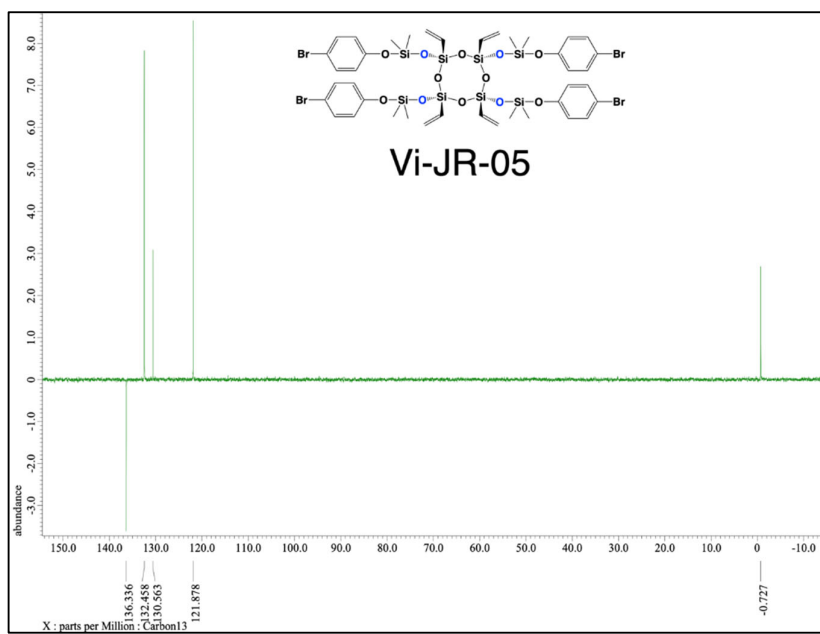

**Figure S25.** <sup>13</sup>C NMR (150.91 MHz, DEPT-135, CDCl<sub>3</sub>): δ −0.73, 121.88, 130.56, 132.46, and 136.34 ppm.

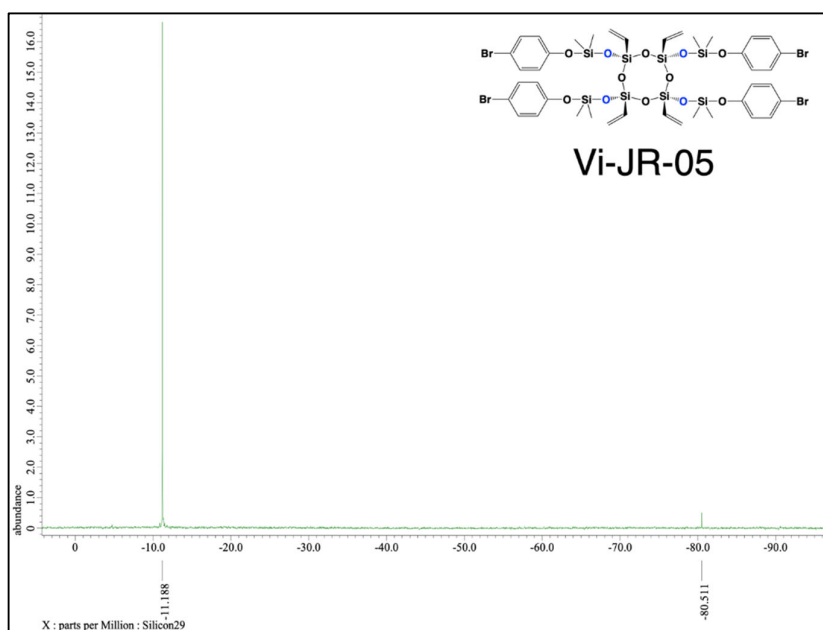

Figure S26.  $^{29}\text{Si}$  NMR (119.24 MHz,  $\text{CDCl}_3$ ):  $\delta$  -11.19 ppm (D-unit Si) and -80.51 ppm (T-unit Si).

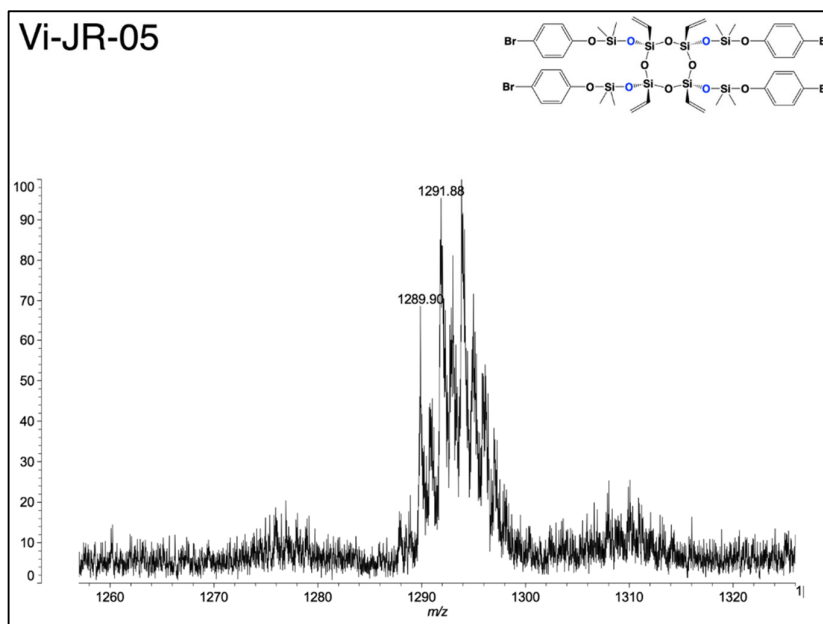

Figure S27. MALDI-TOF results of Vi-JR-05 (Calculated  $[\text{M} + \text{Na}]^+ = 1290.82$ ).

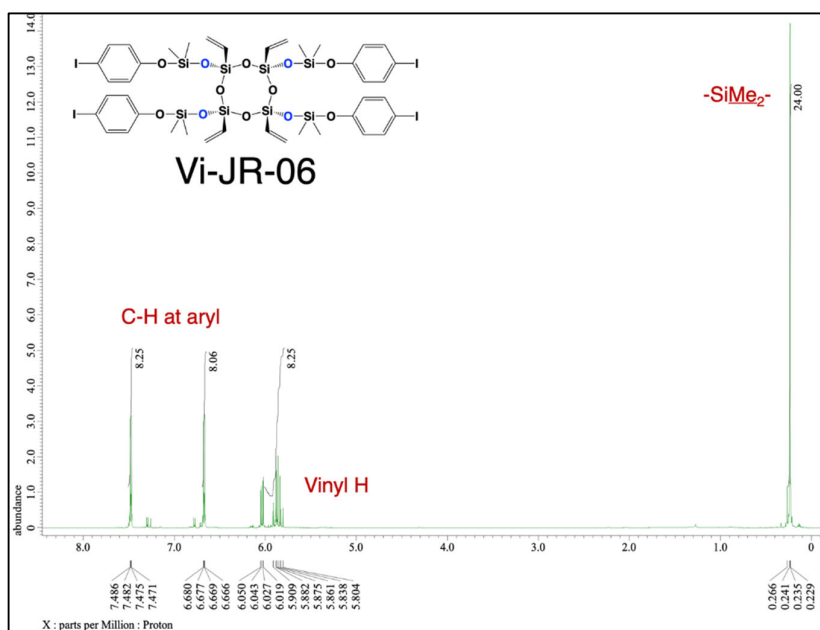

**Figure S28.** <sup>1</sup>H NMR (600.17 MHz, CDCl<sub>3</sub>): δ 0.24 (s, 24H, SiMe<sub>2</sub>), 5.80–6.05 (m, 12H, CH=CH<sub>2</sub> and CH=CH<sub>2</sub> at vinyl group), and 6.67–7.49 ppm (m, 16H, Ar–H).

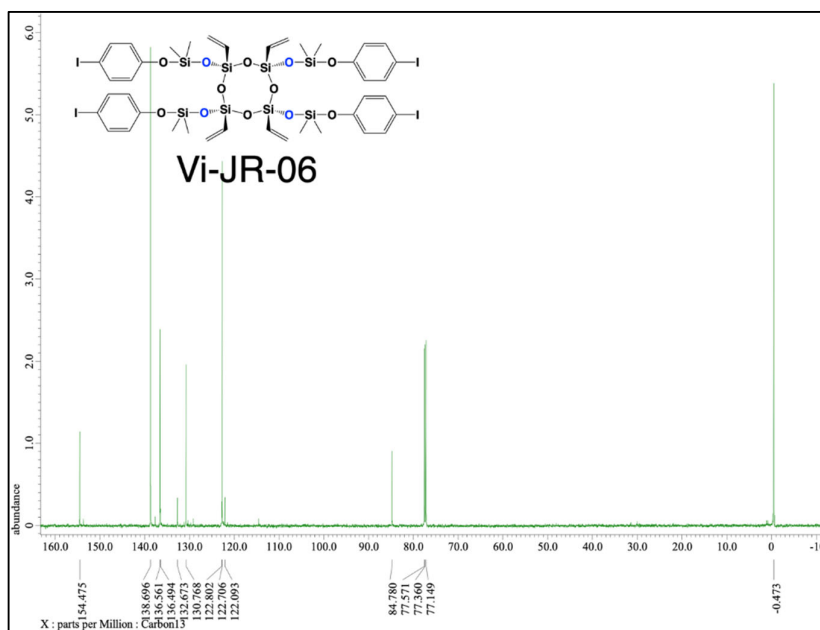

**Figure S29.** <sup>13</sup>C NMR (150.91 MHz, CDCl<sub>3</sub>): δ −0.47, 84.78, 122.71, 130.77, 136.56, 138.70, and 154.47 ppm.

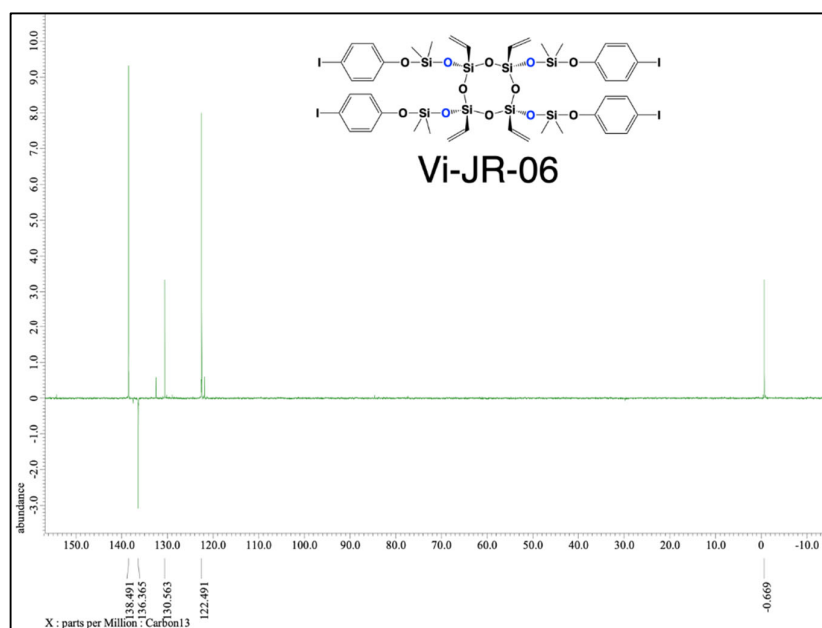

**Figure S30.**  $^{13}\text{C}$  NMR (150.91 MHz, DEPT-135,  $\text{CDCl}_3$ ):  $\delta$  -0.67, 122.49, 130.56, 136.37, and 138.49 ppm.

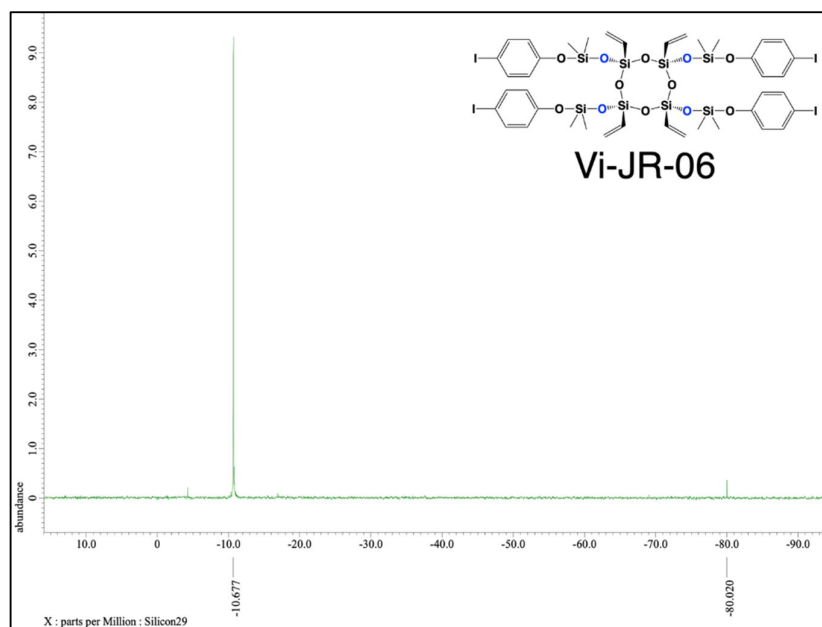

**Figure S31.**  $^{29}\text{Si}$  NMR (119.24 MHz,  $\text{CDCl}_3$ ):  $\delta$  -10.68 ppm (D-unit Si) and -80.02 ppm (T-unit Si).



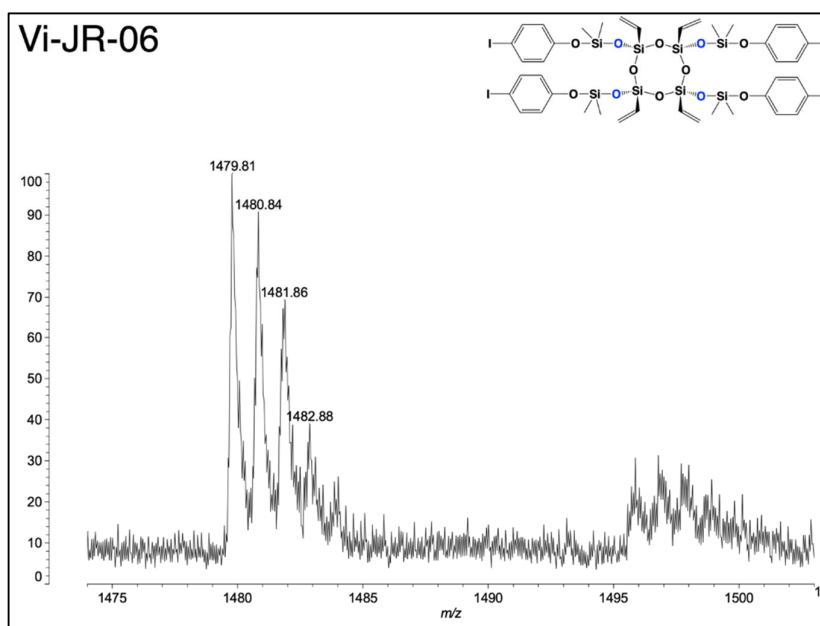

**Figure S32.** MALDI-TOF results of Vi-JR-06 (Calculated  $[M + Na]^+ = 1478.77$ ).

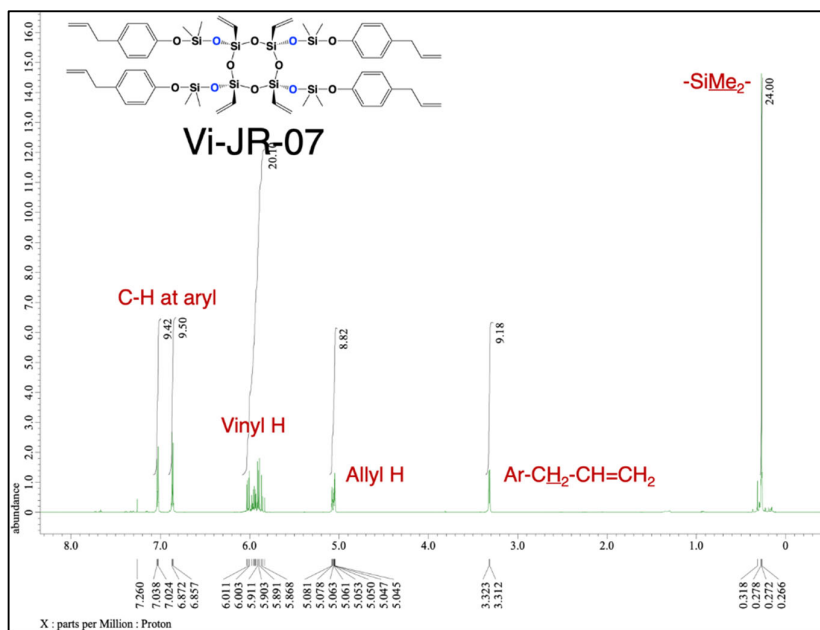

**Figure S33.**  $^1\text{H}$  NMR (600.17 MHz,  $\text{CDCl}_3$ ):  $\delta$  0.27 (s, 24H,  $\text{SiMe}_2$ ), 3.31–3.32 (d, 8H,  $\text{Ar-CH}_2\text{-CH=CH}_2$ ), 5.04–5.08 (m, 8H,  $\text{Ar-CH}_2\text{-CH=CH}_2$ ), 5.87–6.01 (m, 16H,  $\text{CH=CH}_2$ ,  $\text{CH=CH}_2$ , and  $\text{Ar-CH}_2\text{-CH=CH}_2$ ), and 6.85–7.03 ppm (m, 16H, Ar-H).

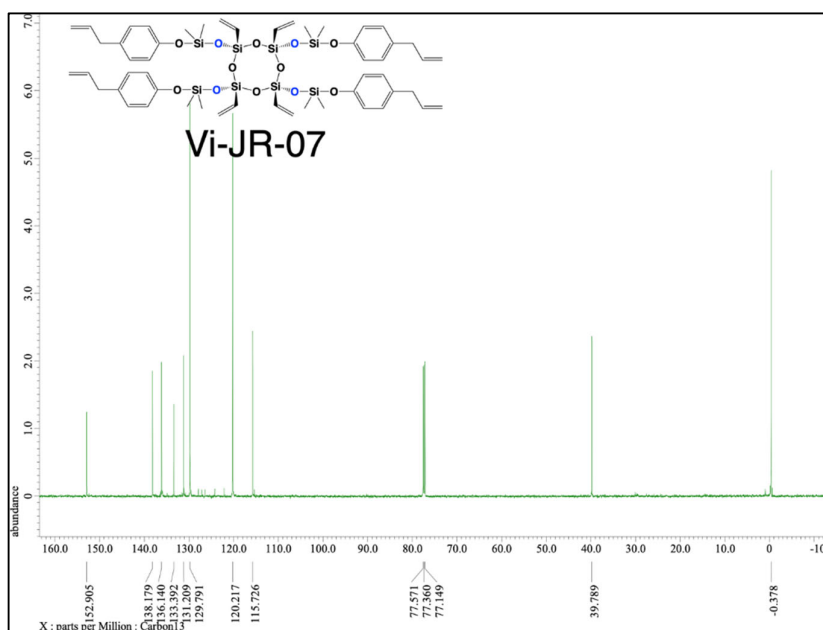

**Figure S34.**  $^{13}\text{C}$  NMR (150.91 MHz,  $\text{CDCl}_3$ ):  $\delta$  −0.38, 39.79, 115.73, 120.22, 129.79, 131.21, 133.39, 136.14, 138.18, and 152.91 ppm.

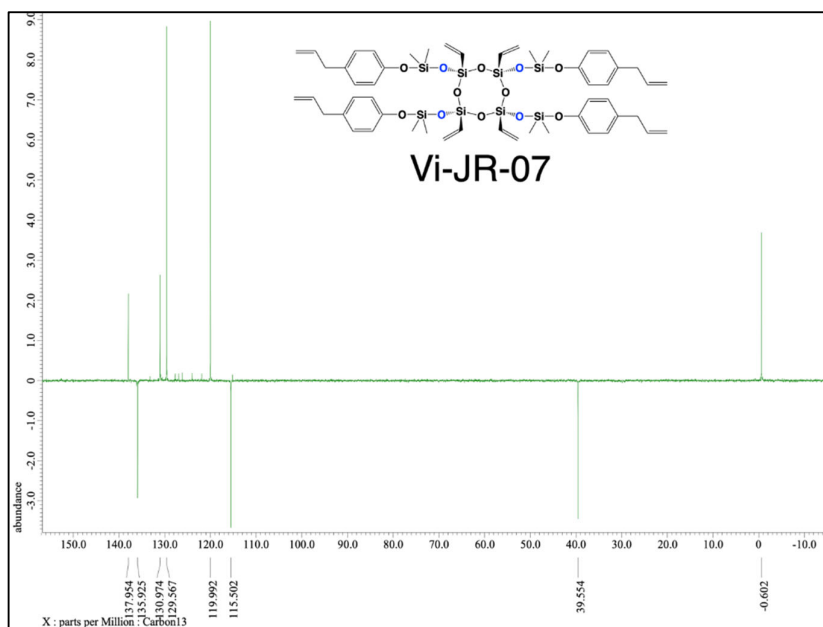

**Figure S35.**  $^{13}\text{C}$  NMR (150.91 MHz, DEPT-135,  $\text{CDCl}_3$ ):  $\delta$  −0.60, 39.55, 115.50, 119.99, 129.57, 130.97, 135.93, and 137.95 ppm.

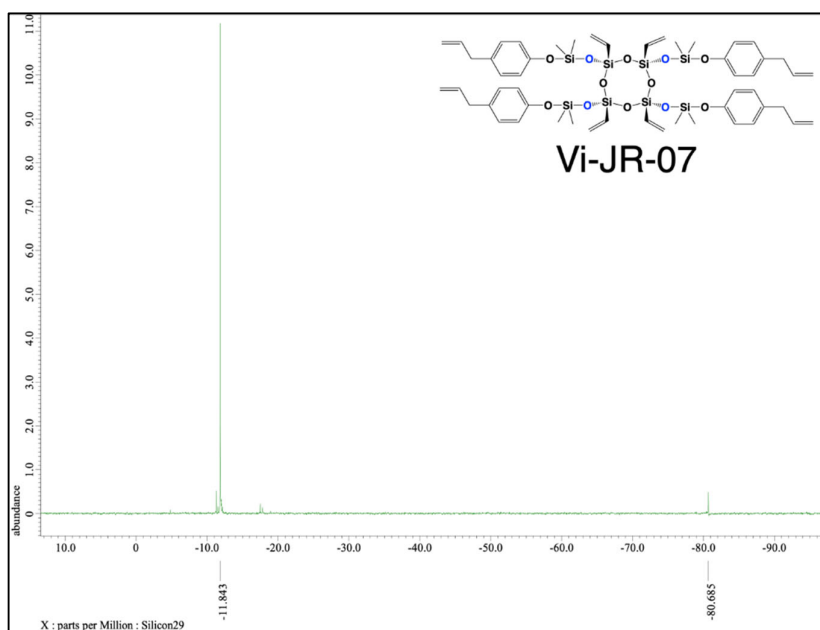

Figure S36.  $^{29}\text{Si}$  NMR (119.24 MHz,  $\text{CDCl}_3$ ):  $\delta$   $-11.84$  ppm (D-unit Si) and  $-80.68$  ppm (T-unit Si).

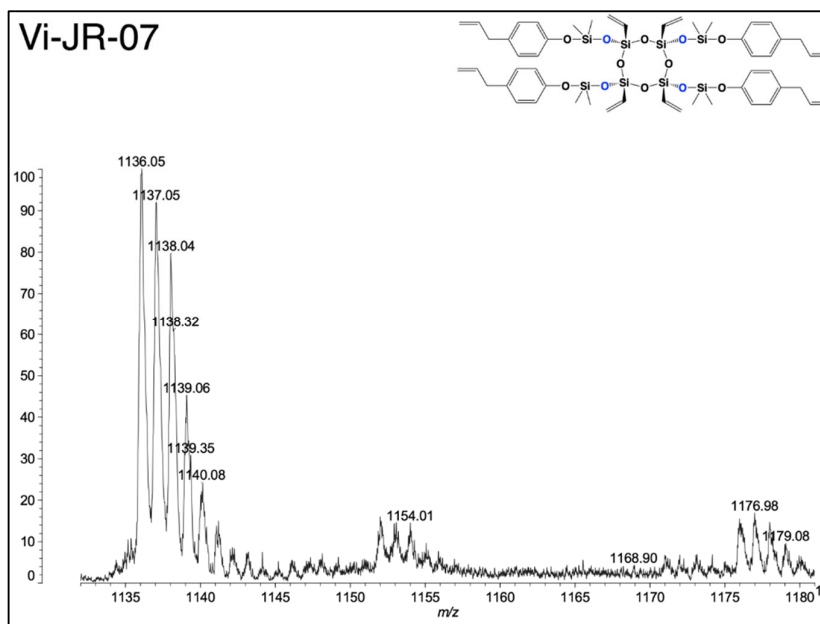

Figure S37. MALDI-TOF results of Vi-JR-07 (Calculated  $[\text{M} + \text{Na}]^+ = 1135.31$ ).

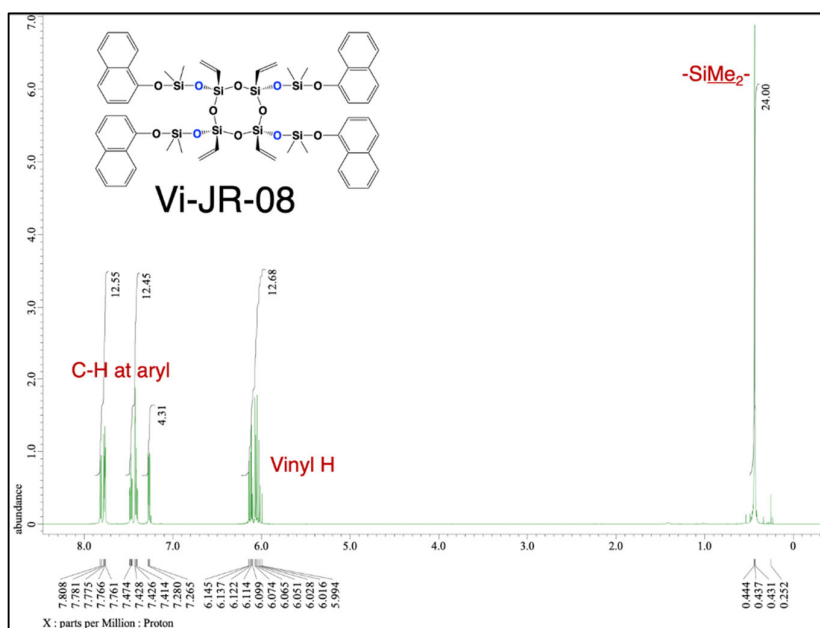

**Figure S38.**  $^1\text{H}$  NMR (600.17 MHz,  $\text{CDCl}_3$ ):  $\delta$  0.44 (s, 24H,  $\text{SiMe}_2$ ), 5.99–6.15 (m, 12H,  $\text{CH}=\text{CH}_2$  and  $\text{CH}=\text{CH}_2$  at vinyl group), and 7.28–7.81 ppm (m, 16H, Ar–H).

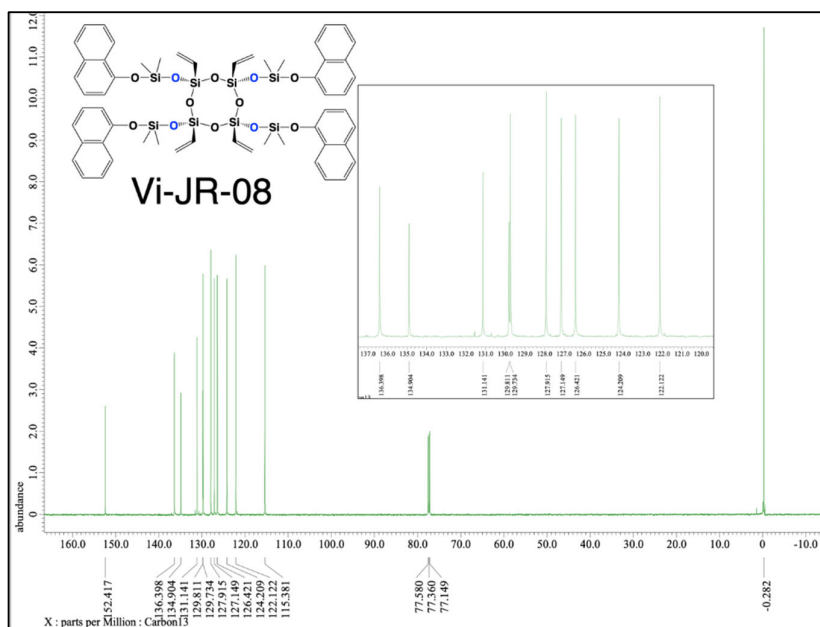

**Figure S39.**  $^{13}\text{C}$  NMR (150.91 MHz,  $\text{CDCl}_3$ ):  $\delta$  −0.28, 115.38, 122.12, 124.21, 126.42, 127.15, 127.92, 129.73, 129.81, 131.41, 134.90, 136.40, and 152.42 ppm.

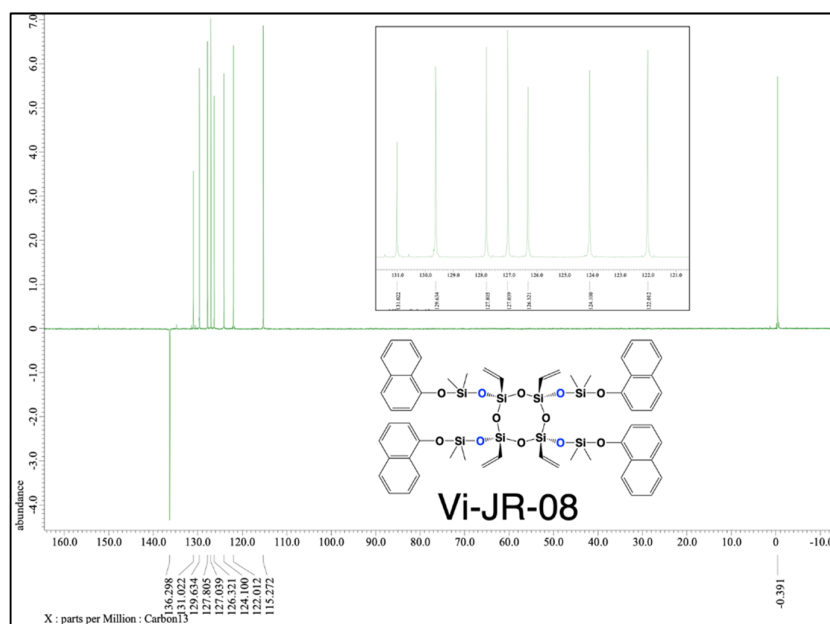

**Figure S40.**  $^{13}\text{C}$  NMR (150.91 MHz, DEPT-135,  $\text{CDCl}_3$ ):  $\delta$  -0.39, 115.27, 122.01, 124.10, 126.32, 127.04, 127.81, 129.63, 131.02, and 136.30 ppm.

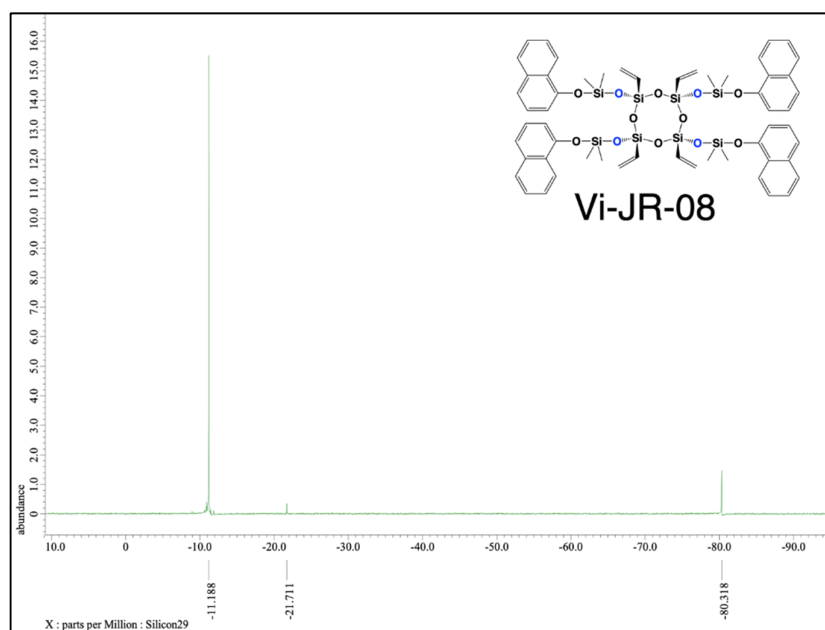

**Figure S41.**  $^{29}\text{Si}$  NMR (119.24 MHz,  $\text{CDCl}_3$ ):  $\delta$  -11.18 ppm (D-unit Si) and -80.32 ppm (T-unit Si).

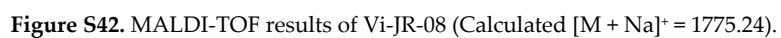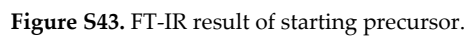

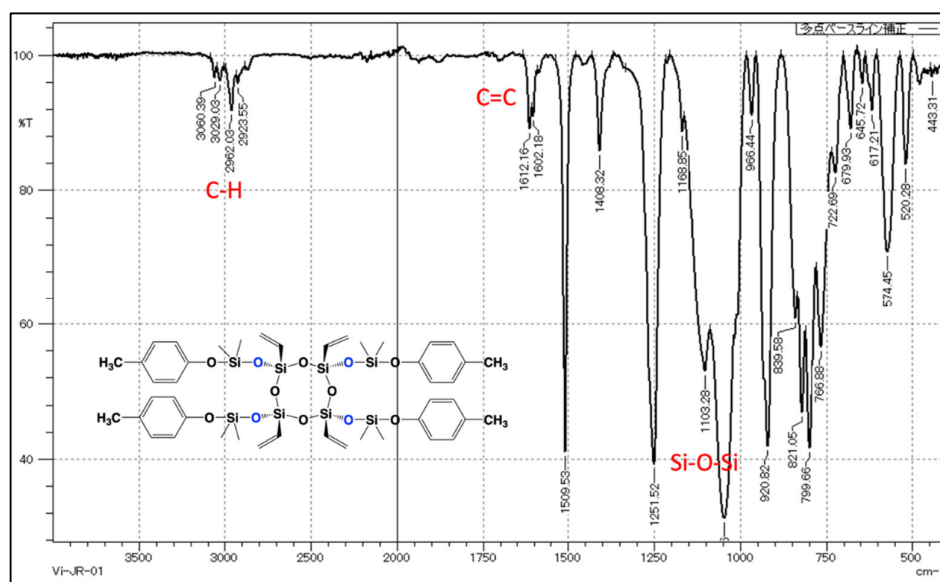

Figure S44. FT-IR result of Vi-JR-01.

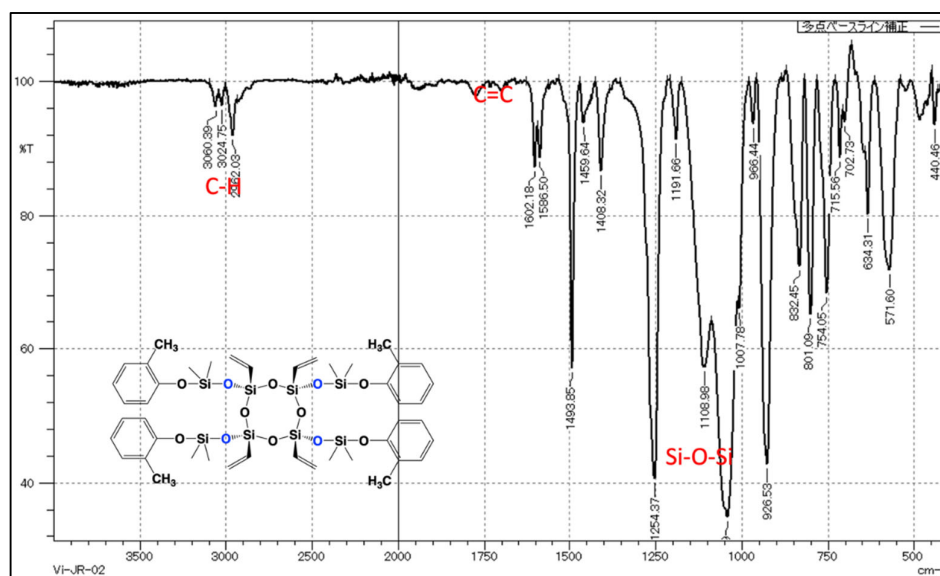

Figure S45. FT-IR result of Vi-JR-02.

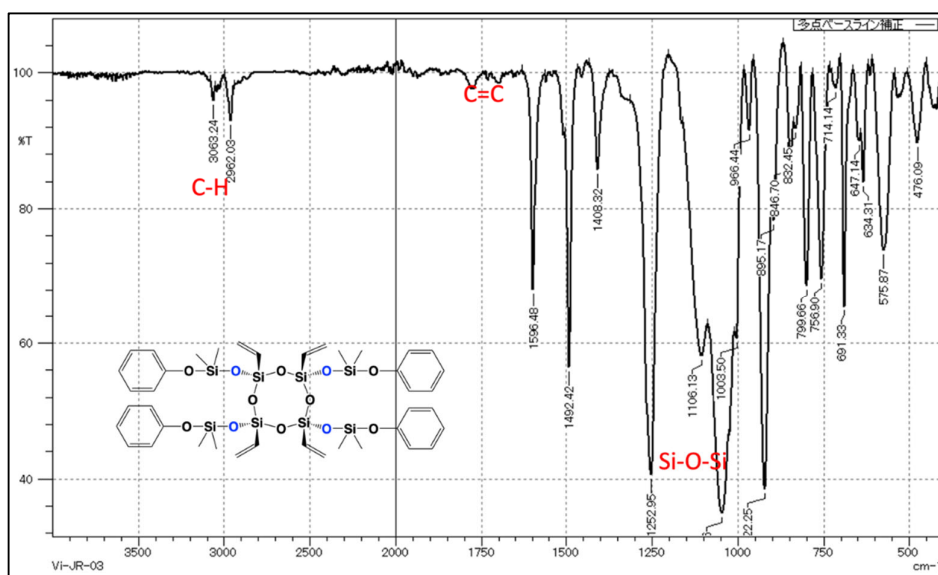

Figure S46. FT-IR result of Vi-JR-03.

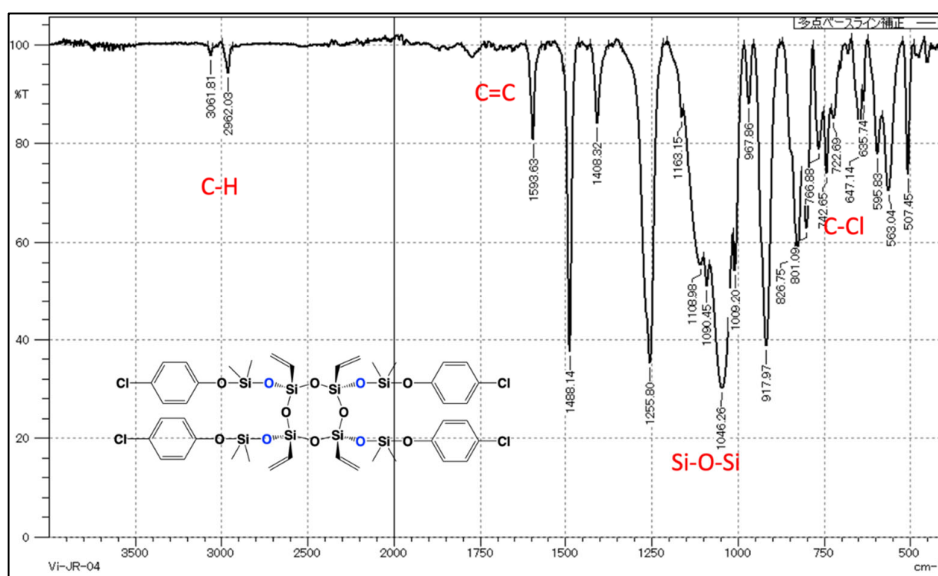

Figure S47. FT-IR result of Vi-JR-04.



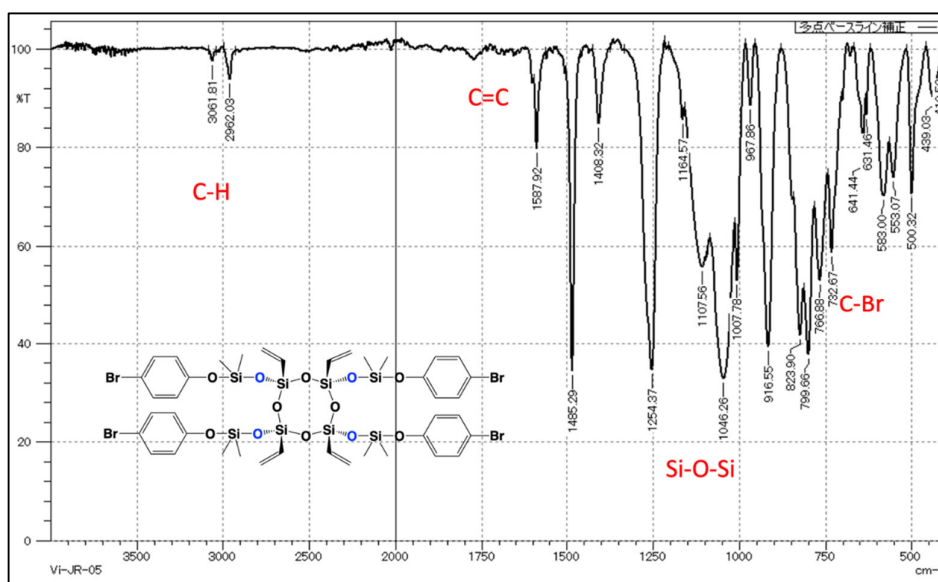

Figure S48. FT-IR result of Vi-JR-05.

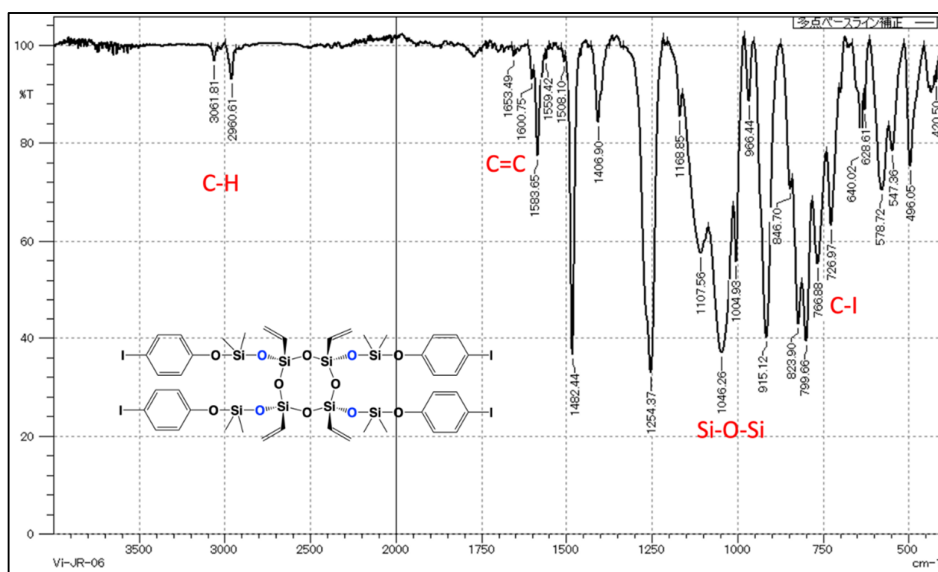

Figure S49. FT-IR result of Vi-JR-06.

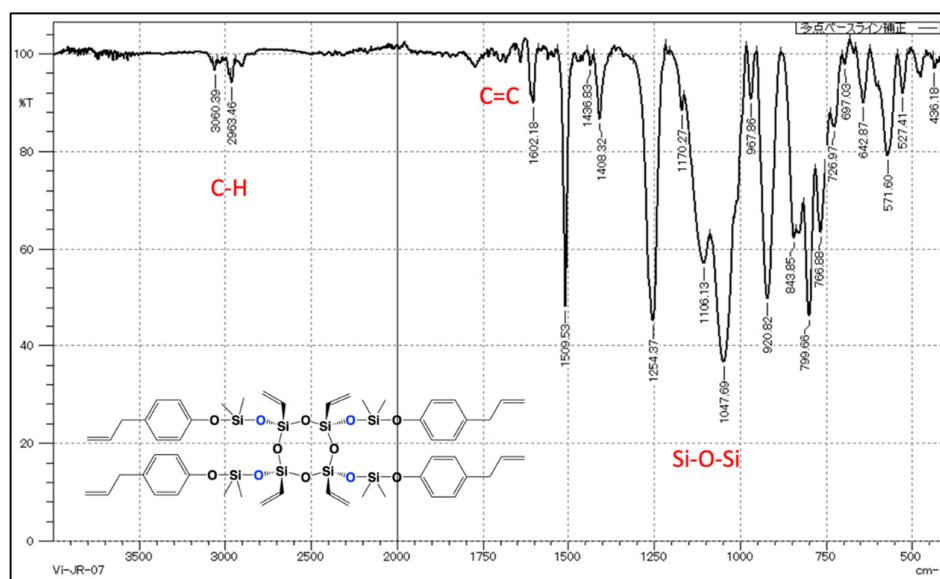

Figure S50. FT-IR result of Vi-JR-07.

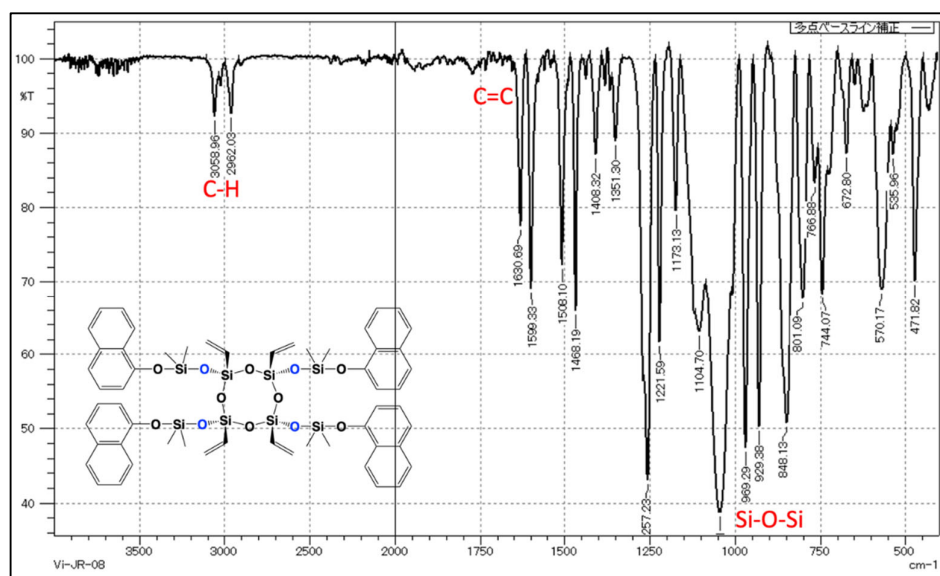

Figure S51. FT-IR result of Vi-JR-08.
